# Supplementary figures and images for: Yeast H2A.Z, FACT complex and RSC regulate transcription of tRNA gene through differential dynamics of flanking nucleosomes
Source: PubMed Central journal article supplement — Nucleic Acids Res. 2011 Jan 25;39(10):4023–34. doi: 10.1093/nar/gkq1286 (PMC3105386; doi:10.1093/nar/gkq1286), 2011-01-25

# Figure S1

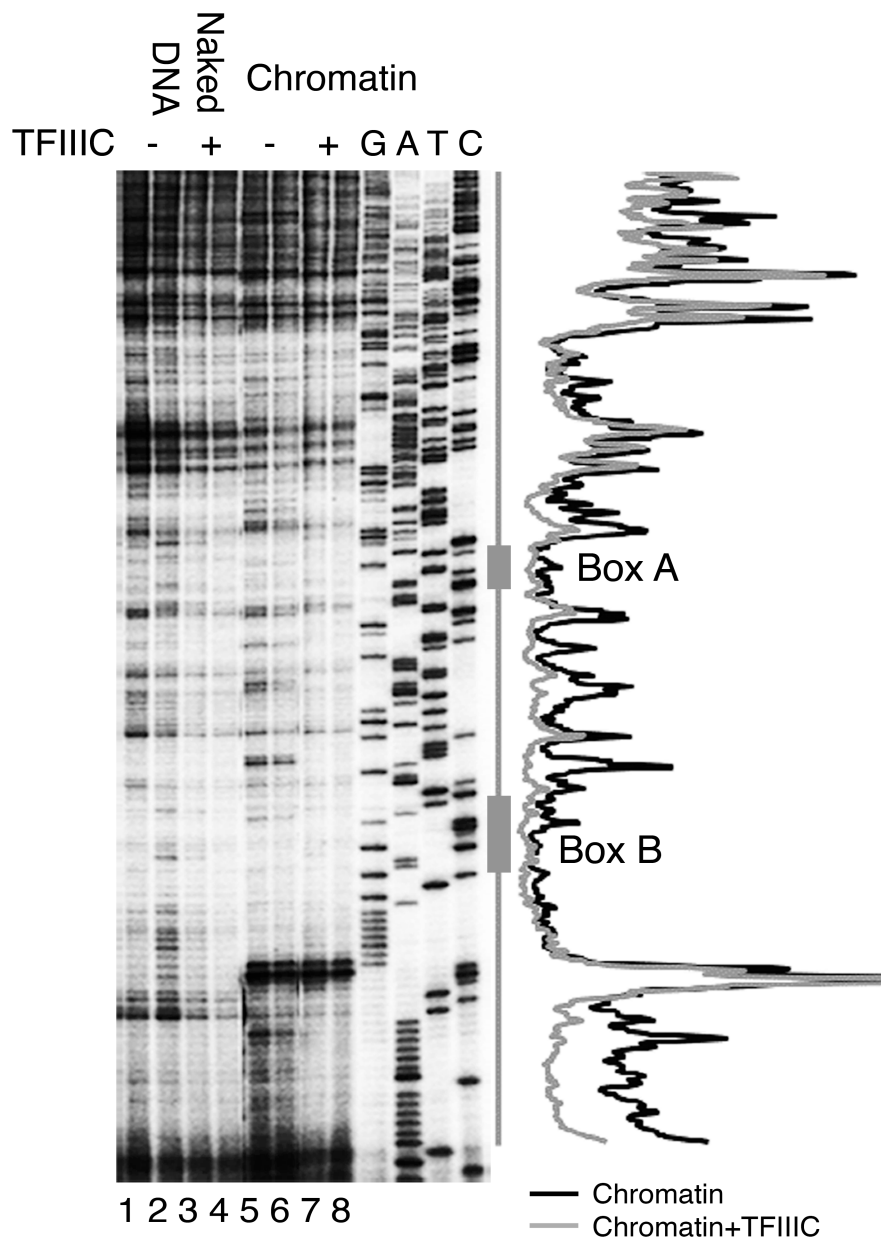

Supplement: supp_gkq1286_FigureS1.pdf [file supp_gkq1286_FigureS1.pdf]

Figure S2

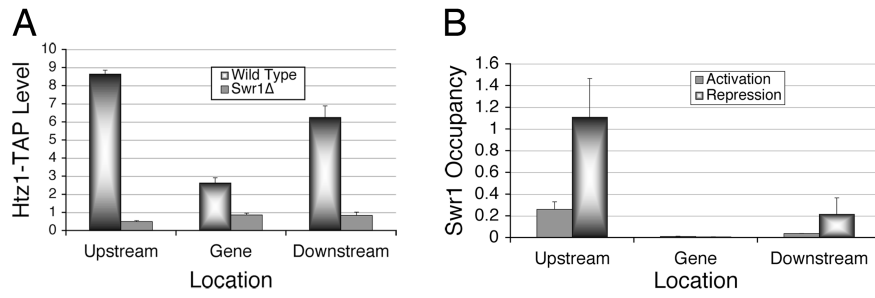

Supplement: supp_gkq1286_FigureS2.pdf [file supp_gkq1286_FigureS2.pdf]

Figure S3

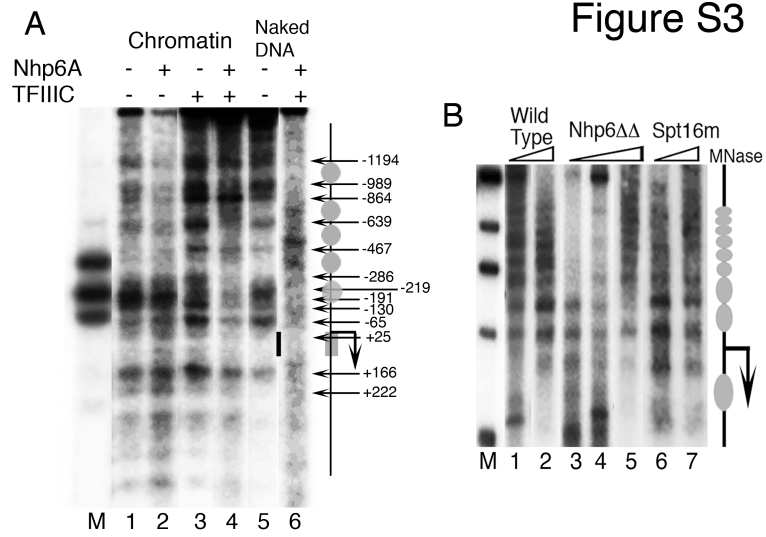

Supplement: supp_gkq1286_FigureS3.pdf [file supp_gkq1286_FigureS3.pdf]

Figure S4

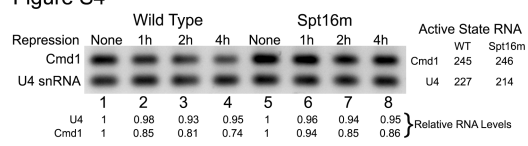

Supplement: supp_gkq1286_FigureS4.pdf [file supp_gkq1286_FigureS4.pdf]

Figure S6

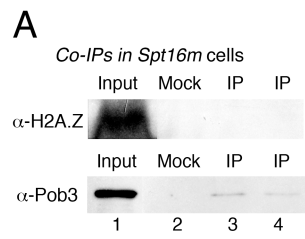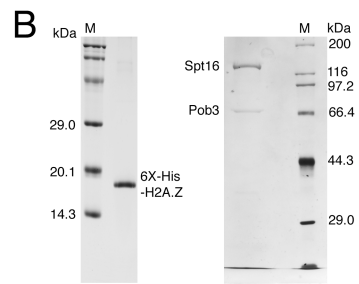

Supplement: supp_gkq1286_FigureS6.pdf [file supp_gkq1286_FigureS6.pdf]
